# Supplementary material for: Comparative transcriptome and metabolome analyses of cherry leaves spot disease caused by Alternaria alternata
Source: Front Plant Sci. 2023 Feb 9;14:1129515. doi: 10.3389/fpls.2023.1129515 (PMC9947566; doi:10.3389/fpls.2023.1129515)
Supplement: Supplementary file 6 [file Table_5.xlsx]

## Sheet: SC_0 dpi-vs-RC_0 dpi
Table S5 KEGG enrichment analysis of DEGs and DAMs enriched in the same pathway
Pathway ID	Pathway	gene_Number	meta_Number
ko00940	Phenylpropanoid biosynthesis	39	3
ko01110	Biosynthesis of secondary metabolites	133	14
ko01100	Metabolic pathways	199	11
ko00941	Flavonoid biosynthesis	16	4
ko00260	Glycine, serine and threonine metabolism	12	2
ko00960	Tropane, piperidine and pyridine alkaloid biosynthesis	5	1
ko00520	Amino sugar and nucleotide sugar metabolism	16	1
ko00330	Arginine and proline metabolism	8	1
ko00410	beta-Alanine metabolism	6	1
ko00943	Isoflavonoid biosynthesis	2	1
ko00908	Zeatin biosynthesis	3	1
ko02010	ABC transporters	5	3
ko00230	Purine metabolism	9	1
ko00020	Citrate cycle (TCA cycle)	5	1
ko00901	Indole alkaloid biosynthesis	1	1
ko00220	Arginine biosynthesis	3	1
ko01230	Biosynthesis of amino acids	17	4
ko00360	Phenylalanine metabolism	3	1
ko00770	Pantothenate and CoA biosynthesis	2	1
ko00460	Cyanoamino acid metabolism	5	1
ko00966	Glucosinolate biosynthesis	1	2
ko00400	Phenylalanine, tyrosine and tryptophan biosynthesis	2	2
ko01200	Carbon metabolism	16	1
ko00740	Riboflavin metabolism	1	1
ko00250	Alanine, aspartate and glutamate metabolism	2	1
ko01210	2-Oxocarboxylic acid metabolism	3	3
ko00970	Aminoacyl-tRNA biosynthesis	4	3
ko00564	Glycerophospholipid metabolism	5	1
ko00040	Pentose and glucuronate interconversions	7	1
ko00380	Tryptophan metabolism	2	1
ko00630	Glyoxylate and dicarboxylate metabolism	3	1

## Sheet: SC_1 dpi-vs-RC_1 dpi
Pathway ID	Pathway	gene_Number	meta_Number
ko01110	Biosynthesis of secondary metabolites	146	14
ko00940	Phenylpropanoid biosynthesis	41	2
ko01100	Metabolic pathways	210	15
ko00960	Tropane, piperidine and pyridine alkaloid biosynthesis	8	1
ko00480	Glutathione metabolism	17	1
ko00941	Flavonoid biosynthesis	14	2
ko00460	Cyanoamino acid metabolism	11	2
ko00400	Phenylalanine, tyrosine and tryptophan biosynthesis	6	2
ko00430	Taurine and hypotaurine metabolism	2	1
ko00260	Glycine, serine and threonine metabolism	10	1
ko00650	Butanoate metabolism	4	2
ko00350	Tyrosine metabolism	7	2
ko00740	Riboflavin metabolism	3	1
ko00660	C5-Branched dibasic acid metabolism	2	1
ko01230	Biosynthesis of amino acids	20	5
ko00910	Nitrogen metabolism	4	1
ko02010	ABC transporters	5	6
ko00920	Sulfur metabolism	3	1
ko00950	Isoquinoline alkaloid biosynthesis	3	1
ko00052	Galactose metabolism	5	1
ko00966	Glucosinolate biosynthesis	2	2
ko00770	Pantothenate and CoA biosynthesis	3	1
ko00965	Betalain biosynthesis	1	1
ko01210	2-Oxocarboxylic acid metabolism	5	4
ko00562	Inositol phosphate metabolism	5	1
ko00360	Phenylalanine metabolism	3	3
ko00230	Purine metabolism	7	1
ko00130	Ubiquinone and other terpenoid-quinone biosynthesis	3	1
ko00250	Alanine, aspartate and glutamate metabolism	3	3
ko00330	Arginine and proline metabolism	4	3
ko00970	Aminoacyl-tRNA biosynthesis	5	4
ko00220	Arginine biosynthesis	2	2
ko00020	Citrate cycle (TCA cycle)	3	2
ko04070	Phosphatidylinositol signaling system	4	1
ko00340	Histidine metabolism	1	1
ko00640	Propanoate metabolism	2	1
ko00620	Pyruvate metabolism	5	1
ko00730	Thiamine metabolism	1	1
ko00760	Nicotinate and nicotinamide metabolism	1	1
ko00860	Porphyrin and chlorophyll metabolism	2	1
ko00190	Oxidative phosphorylation	7	1
ko01200	Carbon metabolism	14	3
ko00564	Glycerophospholipid metabolism	4	1
ko00053	Ascorbate and aldarate metabolism	1	2
ko00630	Glyoxylate and dicarboxylate metabolism	2	3
ko00051	Fructose and mannose metabolism	1	1
ko00040	Pentose and glucuronate interconversions	4	1

## Sheet: SC_5 dpi-vs-RC_5 dpi
Pathway ID	Pathway	gene_Number	meta_Number
ko01110	Biosynthesis of secondary metabolites	235	14
ko01100	Metabolic pathways	346	21
ko00592	alpha-Linolenic acid metabolism	22	1
ko00940	Phenylpropanoid biosynthesis	48	3
ko00630	Glyoxylate and dicarboxylate metabolism	19	1
ko00260	Glycine, serine and threonine metabolism	20	4
ko00460	Cyanoamino acid metabolism	20	3
ko00591	Linoleic acid metabolism	6	2
ko00740	Riboflavin metabolism	6	1
ko00960	Tropane, piperidine and pyridine alkaloid biosynthesis	6	2
ko00350	Tyrosine metabolism	11	1
ko00908	Zeatin biosynthesis	5	1
ko00250	Alanine, aspartate and glutamate metabolism	8	1
ko02010	ABC transporters	9	6
ko00950	Isoquinoline alkaloid biosynthesis	6	1
ko00261	Monobactam biosynthesis	3	2
ko01040	Biosynthesis of unsaturated fatty acids	5	4
ko00130	Ubiquinone and other terpenoid-quinone biosynthesis	7	1
ko00053	Ascorbate and aldarate metabolism	7	1
ko00941	Flavonoid biosynthesis	15	1
ko00400	Phenylalanine, tyrosine and tryptophan biosynthesis	6	3
ko00730	Thiamine metabolism	4	1
ko00970	Aminoacyl-tRNA biosynthesis	10	5
ko01200	Carbon metabolism	31	1
ko00901	Indole alkaloid biosynthesis	1	1
ko00330	Arginine and proline metabolism	7	2
ko00220	Arginine biosynthesis	4	1
ko00965	Betalain biosynthesis	1	1
ko00562	Inositol phosphate metabolism	7	1
ko00360	Phenylalanine metabolism	4	3
ko00040	Pentose and glucuronate interconversions	15	1
ko01230	Biosynthesis of amino acids	25	8
ko00564	Glycerophospholipid metabolism	11	1
ko00230	Purine metabolism	10	2
ko00760	Nicotinate and nicotinamide metabolism	2	1
ko00052	Galactose metabolism	5	1
ko00620	Pyruvate metabolism	7	1
ko04070	Phosphatidylinositol signaling system	5	1
ko00380	Tryptophan metabolism	3	1
ko00020	Citrate cycle (TCA cycle)	3	1
ko01210	2-Oxocarboxylic acid metabolism	3	7
ko00770	Pantothenate and CoA biosynthesis	1	1
